# Supplementary material for: Cryo-EM structure of a microtubule-bound parasite kinesin motor and implications for its mechanism and inhibition
Source: PubMed Central journal article supplement (PMC8526983; doi:10.1016/j.jbc.2021.101063), 2021-08-08
Supplement: mmc1.pdf [file mmc1.pdf]

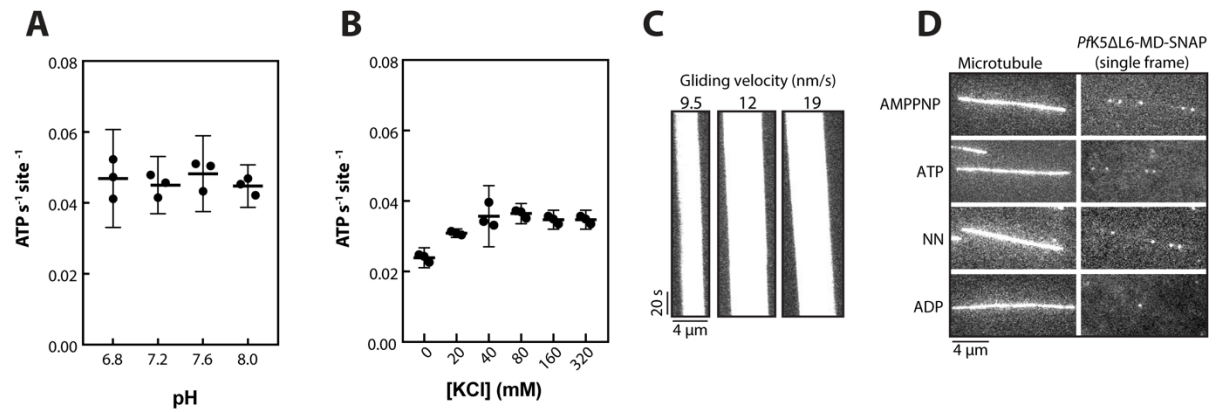

**Figure S1. Biochemical behaviour of *Pfk5ΔL6*-MD constructs.** (A) Effect of pH on *Pfk5ΔL6*-MD ATPase rate, with PIPES used for pH 6.8, HEPES for pH 7.2 and 7.6, and Tris-HCl for pH 8.0.  $n = 3$  (technical replicates). The mean and 95 % confidence interval are plotted. A constant of 200  $\mu\text{M}$  MTs was used. (B) As in (A), for the effect of KCl concentration on *Pfk5ΔL6*-MD ATPase activity. (C) Example kymographs from *Pfk5ΔL6*-MD-SNAP mediated MT gliding experiments, annotated with measured velocities. 0.0859  $\mu\text{m}/\text{pixel}$ , and 0.57  $\text{s}/\text{pixel}$ . (D) Raw data from *Pfk5ΔL6*-MD-SNAP single molecule MT binding experiments, with different nucleotide treatments (NN = no nucleotide). On the left, the MT reference image is shown, and on the right is an example single frame from the corresponding *Pfk5ΔL6*-MD-SNAP movie. 0.0859  $\mu\text{m}/\text{pixel}$ .

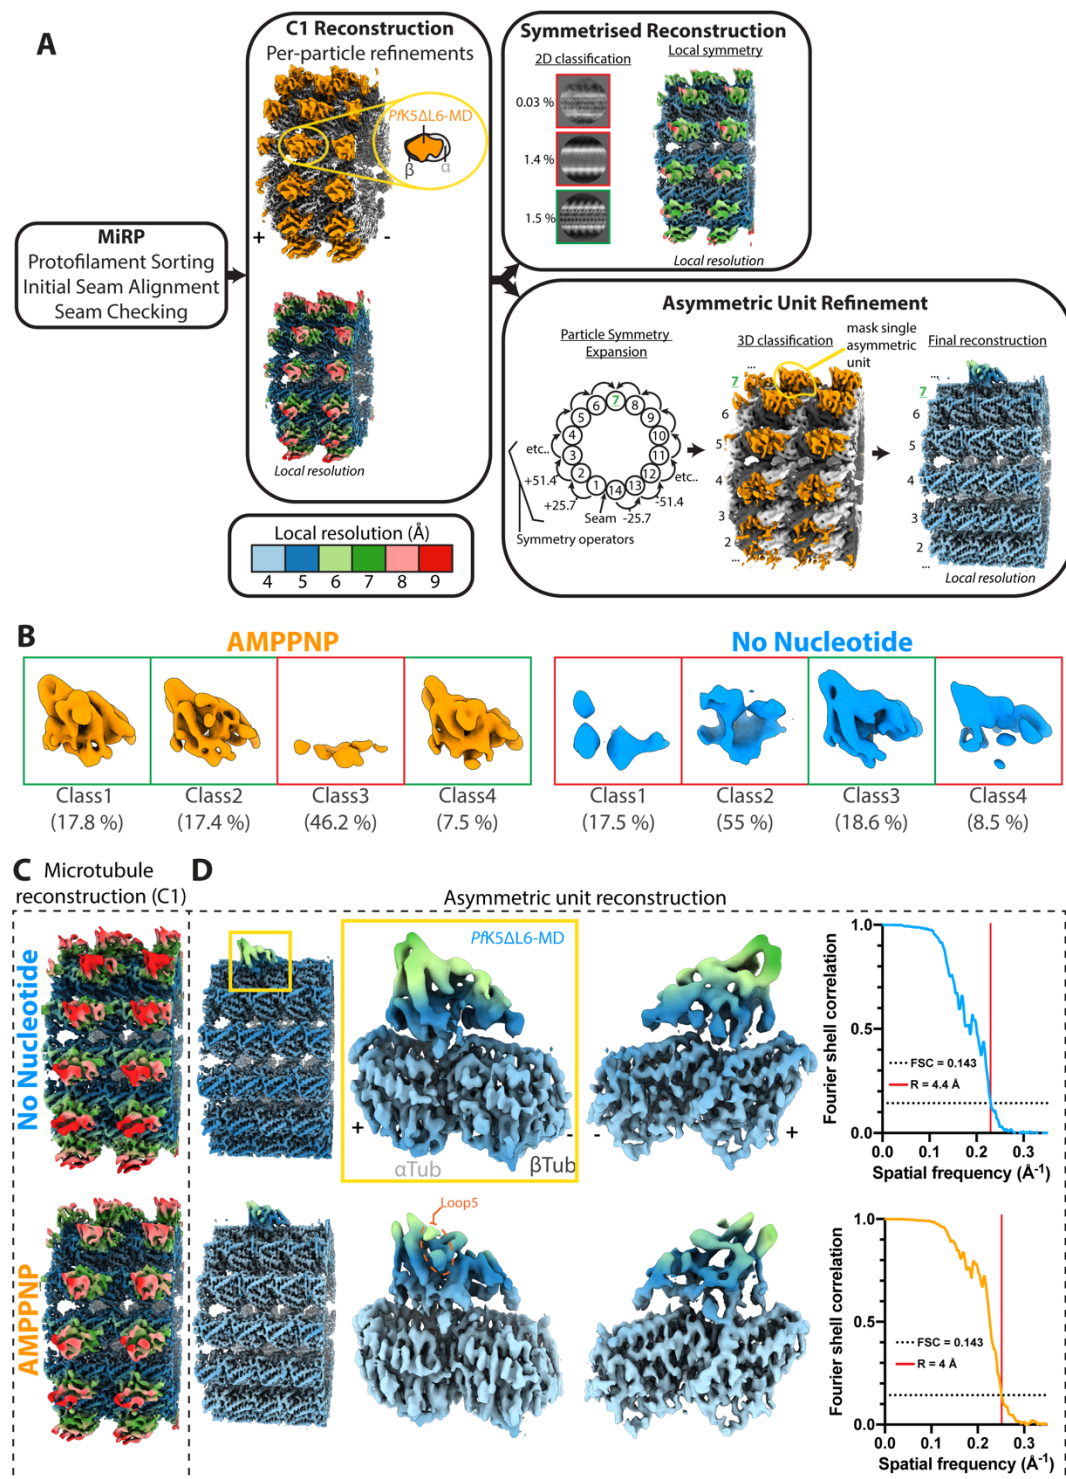

**Figure S2. Cryo-EM 3D reconstruction and molecule modelling of *Pfk5ΔL6-MD* no nucleotide and AMPPNP states.** (A) Overview of the 3D image processing strategy employed, with reconstructions of the *Pfk5ΔL6-MD* AMPPNP for each step shown, and coloured by local resolution. Firstly, alignment of asymmetric 14 protofilament MTs is achieved with MiRP steps. Then, a high resolution alignment and reconstruction is performed without applying symmetry, and per-particle CTF and motion correction is performed. A symmetrised reconstruction using local symmetry in RELION can then be created, and improved using 2D classification to select for optimal particles. Example 2D

classes are displayed in green or red boxes which indicate classes that were selected or discarded respectively. To improve decay in *Pfk5ΔL6*-MD resolution, an asymmetric unit refinement step is performed where symmetry expansion and 3D classification are used to obtain a more homogeneous subset of *Pfk5ΔL6*-MD motors. MT protofilament numbers are labelled 1-14, with protofilament 7 highlighted in green to indicate the location of classification mask. (B) 3D class averages from the *Pfk5ΔL6*-MD focussed classification step in asymmetric unit refinement. The red and green boxes indicate classes that were discarded or selected respectively. (C) C1 (unsymmetrised) *Pfk5ΔL6*-MD/microtubule reconstructions for the *Pfk5ΔL6*-MD no nucleotide and AMPPNP states, coloured according to the local resolution scheme in (A). (D) *Pfk5ΔL6*-MD no nucleotide and AMPPNP state structures after asymmetric unit refinement. Surface colouring is according to the local resolution scheme in (A). On the left, the central portion of the *Pfk5ΔL6*-MD/microtubule reconstructions, with *Pfk5ΔL6*-MD enriched at one site. In the middle, the *Pfk5ΔL6*-MD/ $\alpha\beta$ -tubulin asymmetric unit extracted from the microtubule reconstruction on the left. On the right, Fourier shell correlation (FSC) calculated from independently refined data halves, used to calculate overall resolution (R). FSC was calculated using a solvent mask.

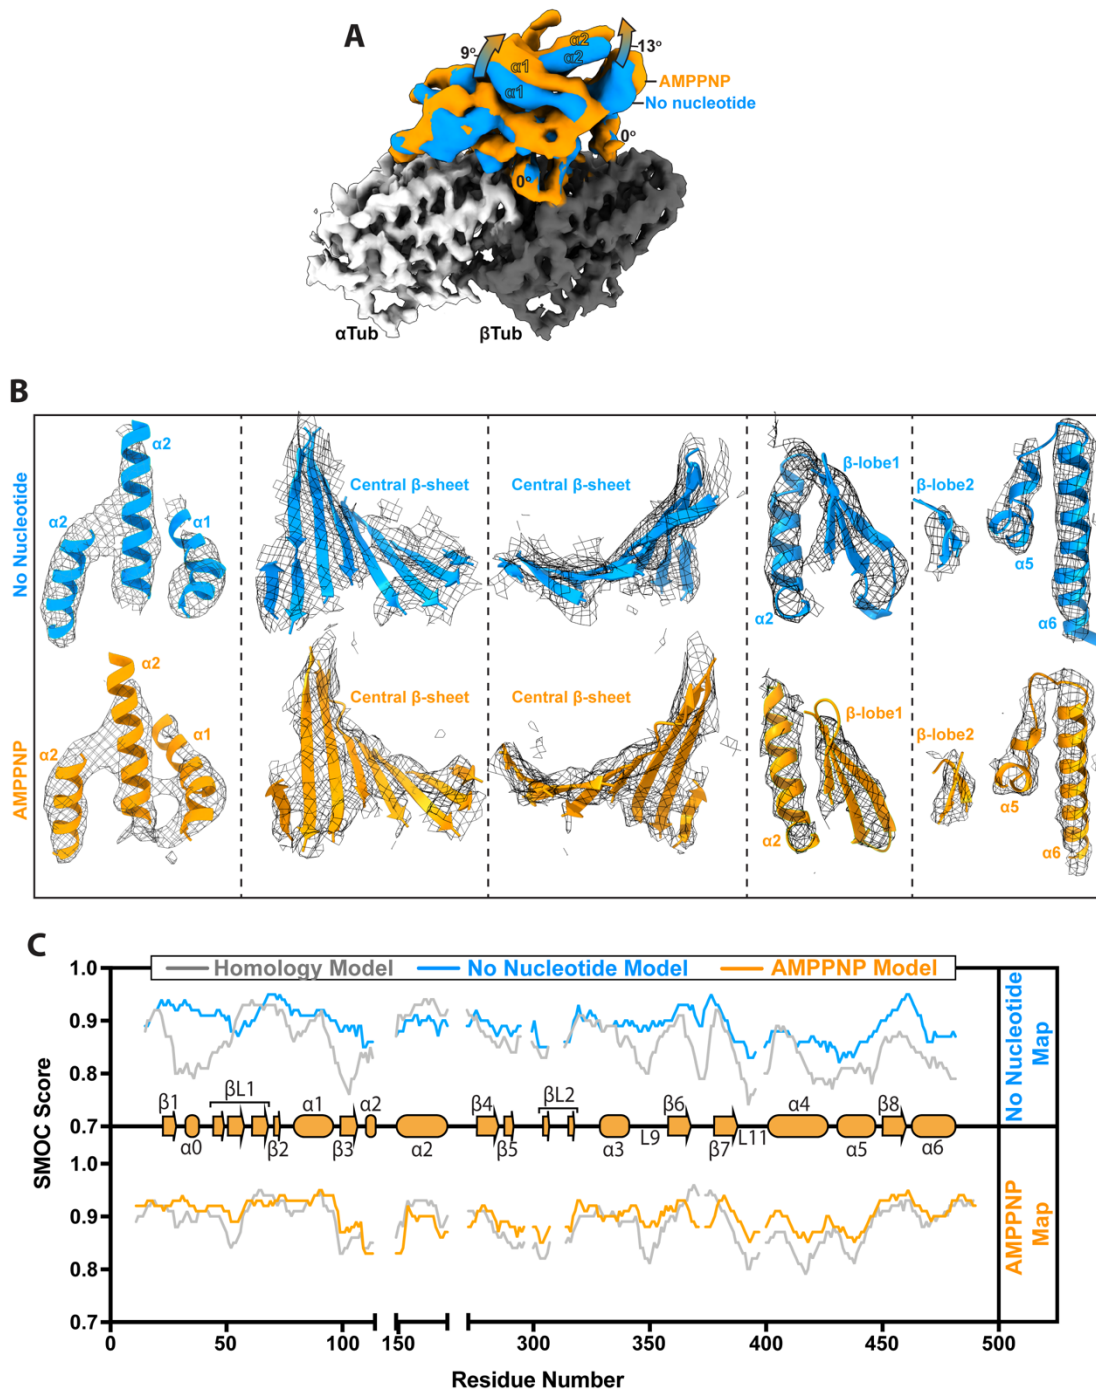

**Figure S3. Secondary structure conformations of the *Pfk5ΔL6*-MD no nucleotide and AMPPNP states.** (A) Alignment of the no nucleotide and AMPPNP state cryo-EM maps on  $\alpha\beta$ -tubulin, showing that conformational changes between the no nucleotide and AMPPNP state can be observed in the cryo-EM maps. (B) The fit to density of the models for various *Pfk5ΔL6*-MD secondary structure elements, showing that  $\alpha$ -helices and  $\beta$ -sheets are well resolved. (C) Per-residue TEMPy SMOC scores<sup>84,85</sup> for the no nucleotide and AMPPNP state models, that indicate the fit of the model to cryo-EM maps. The SMOC score for the homology model is also shown, to demonstrate how the flexible fitting process has improved the models fit to density.

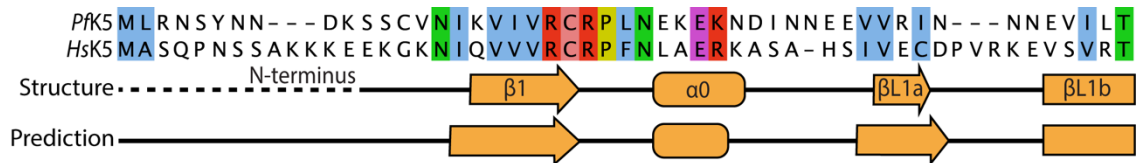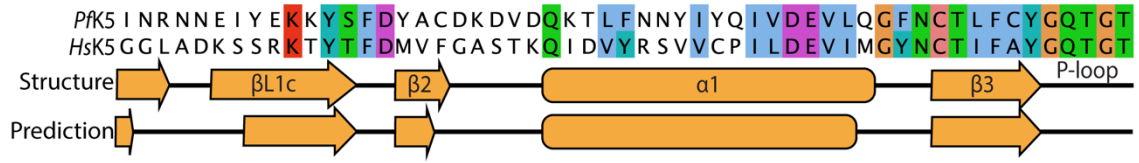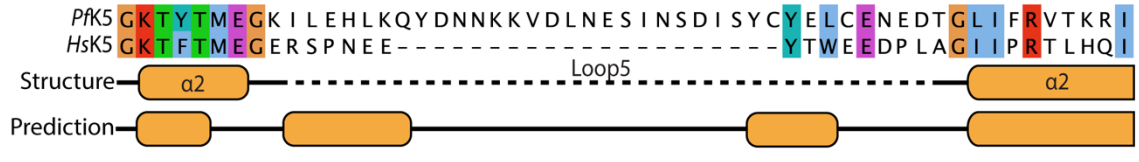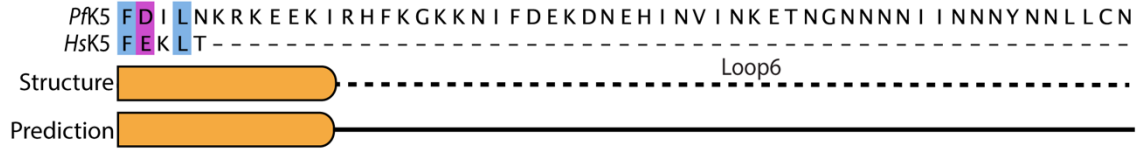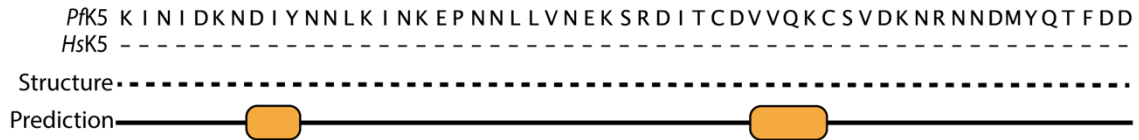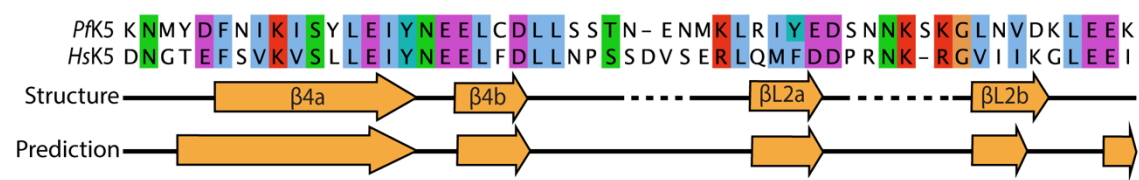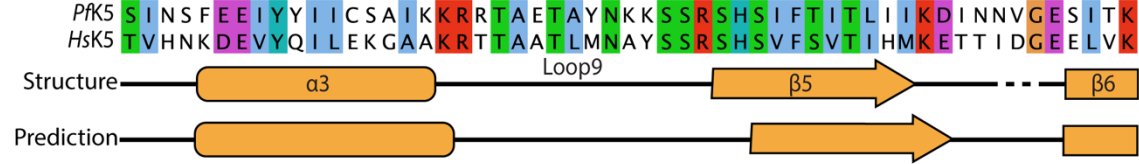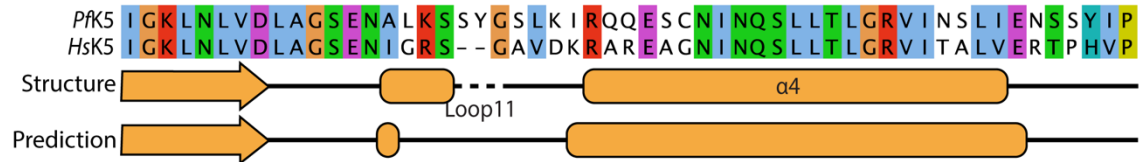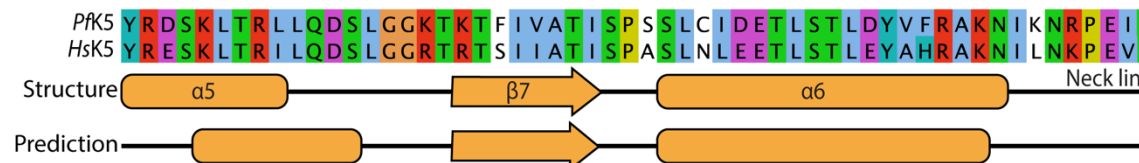

**Figure S4. Primary sequence alignment of *Pfk5* and *Hsk5*.** Coloured by the ClustalX scheme. Secondary structure elements corresponding to the *Pfk5* $\Delta$ L6-MD AMPPNP structure are shown, in addition to secondary structure prediction for *Pfk5*.

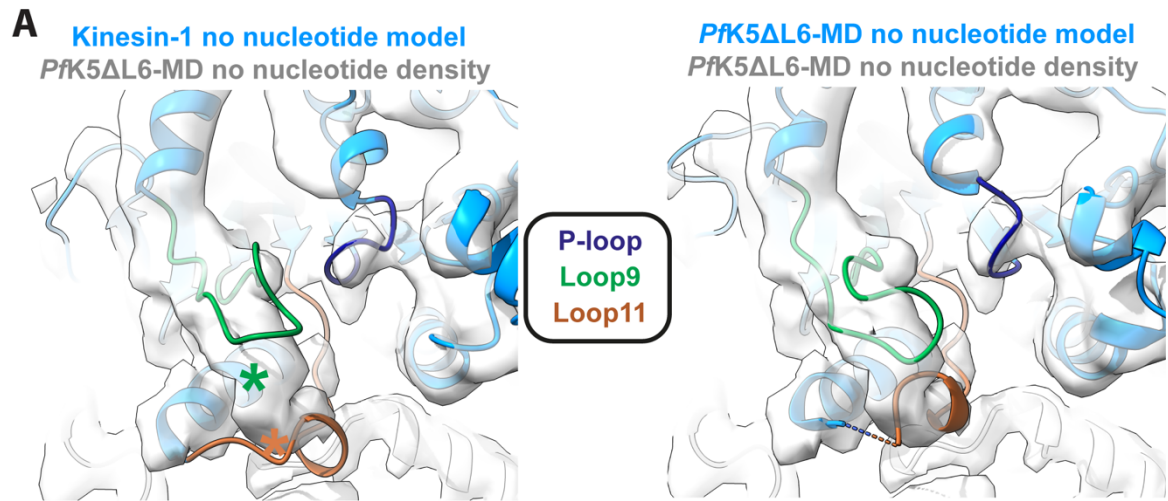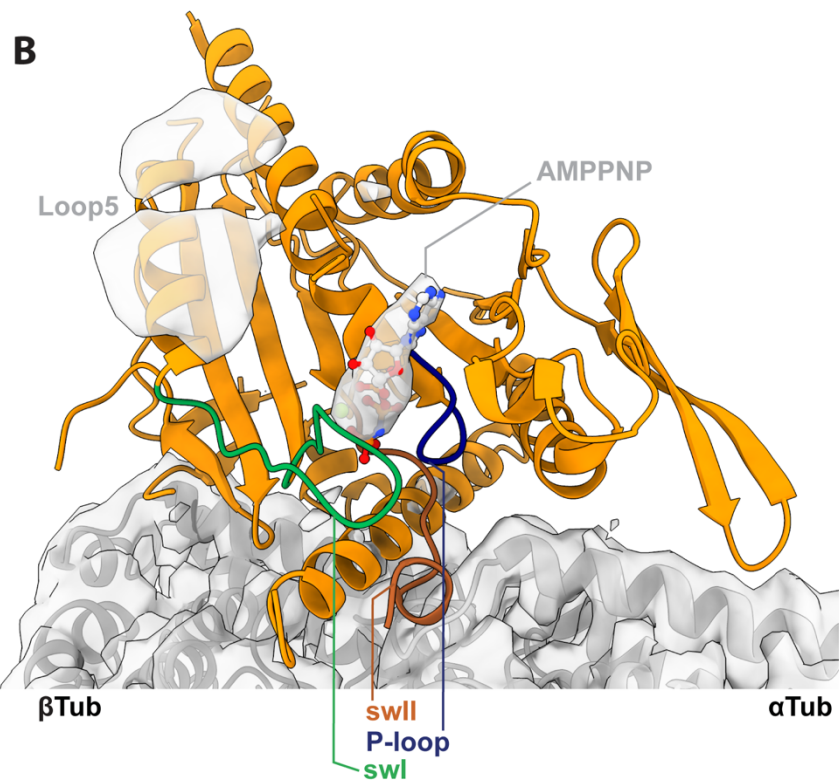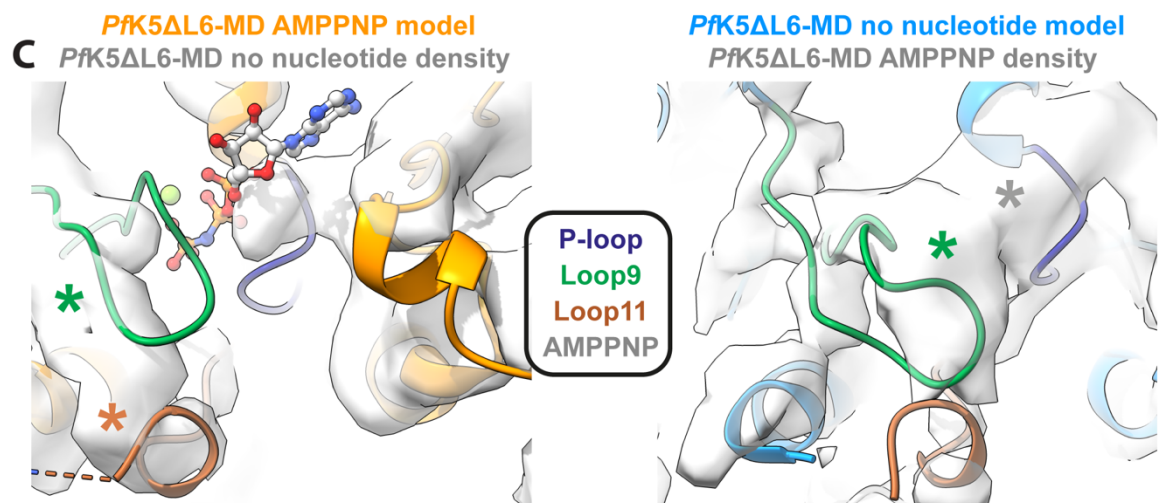

**Figure S5. *Pfk5ΔL6*-MD nucleotide binding site.** (A) To highlight differences between *Pfk5ΔL6*-MD no nucleotide switch loop structure and previous kinesin motor domain structures, the left panel shows a no nucleotide kinesin-1 cryo-EM structure (blue; PDB ID: 3J8X) rigid-body fitted into *Pfk5ΔL6*-MD no nucleotide density (grey), demonstrating that the kinesin-1 switch loops are a poor fit (indicated using coloured \*). This is compared to the *Pfk5ΔL6*-MD no nucleotide model in the right panel. (B) To illustrate cryo-EM density corresponding to AMPPNP, synthetic density corresponding to the protein components of the *Pfk5ΔL6*-MD model – i.e. without AMPPNP - was calculated at 6 Å and was subtracted from *Pfk5ΔL6*-MD AMPPNP state cryo-EM reconstruction. The resulting difference density corresponds to the bound nucleotide (modelled as AMPPNP given the sample preparation conditions), αβ-tubulin, and loop5, which was not included in the model. (C) To highlight structural differences in the nucleotide binding site between the *Pfk5ΔL6*-MD no nucleotide and AMPPNP states, in the left panel the *Pfk5ΔL6*-MD AMPPNP state model (orange) is rigid body fitted to no nucleotide state density (grey), showing a poor fit to density (indicated using coloured \*). In the right panel, the *Pfk5ΔL6*-MD no nucleotide state model (blue) is rigid-body fitted to *Pfk5ΔL6*-MD AMPPNP state density (grey).



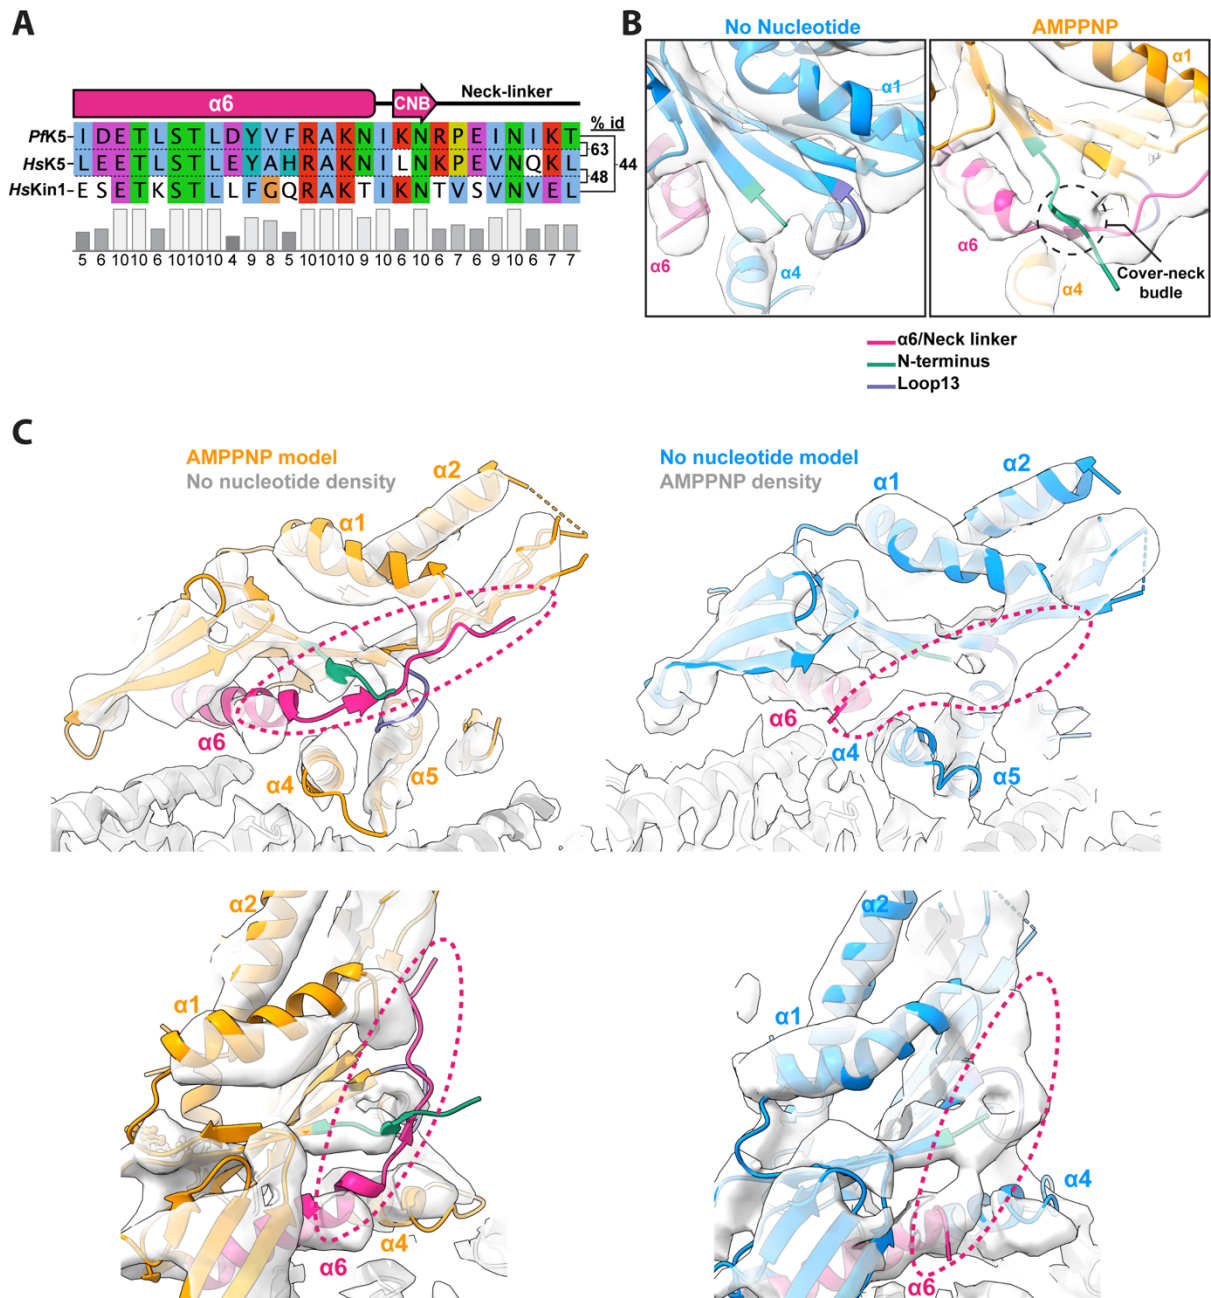

**Figure S6. *Pfk5* $\Delta$ L6-MD cover-neck bundle and neck linker formation.** (A) Sequence alignment of helix $\alpha$ 6 and the neck-linker, with conservation score from Jalview below. % sequence identity between the different kinesins is noted on the right. (B) View of the *Pfk5* $\Delta$ L6-MD no nucleotide and AMPPNP reconstructions showing increased density for the N-terminus in the AMPPNP state, supporting cover neck bundle formation. (C) Demonstration of the presence of neck linker density in the *Pfk5* $\Delta$ L6-MD AMPPNP state, and its absence in the no nucleotide state. In the top and bottom left panels, the *Pfk5* $\Delta$ L6-MD AMPPNP state model (orange) is shown rigid-body fitted into *Pfk5* $\Delta$ L6-MD no nucleotide density (light grey). The *Pfk5* $\Delta$ L6-MD model was fitted into density independently of  $\alpha/\beta$ -tubulin. In the top and bottom right panels the *Pfk5* $\Delta$ L6-MD no nucleotide state model (blue) is shown rigid-body fitted into *Pfk5* $\Delta$ L6-MD AMPPNP state density, with a pink dotted line demonstrating empty density for the neck linker, that is not accounted for by the no nucleotide state model.

**α-tubulin**

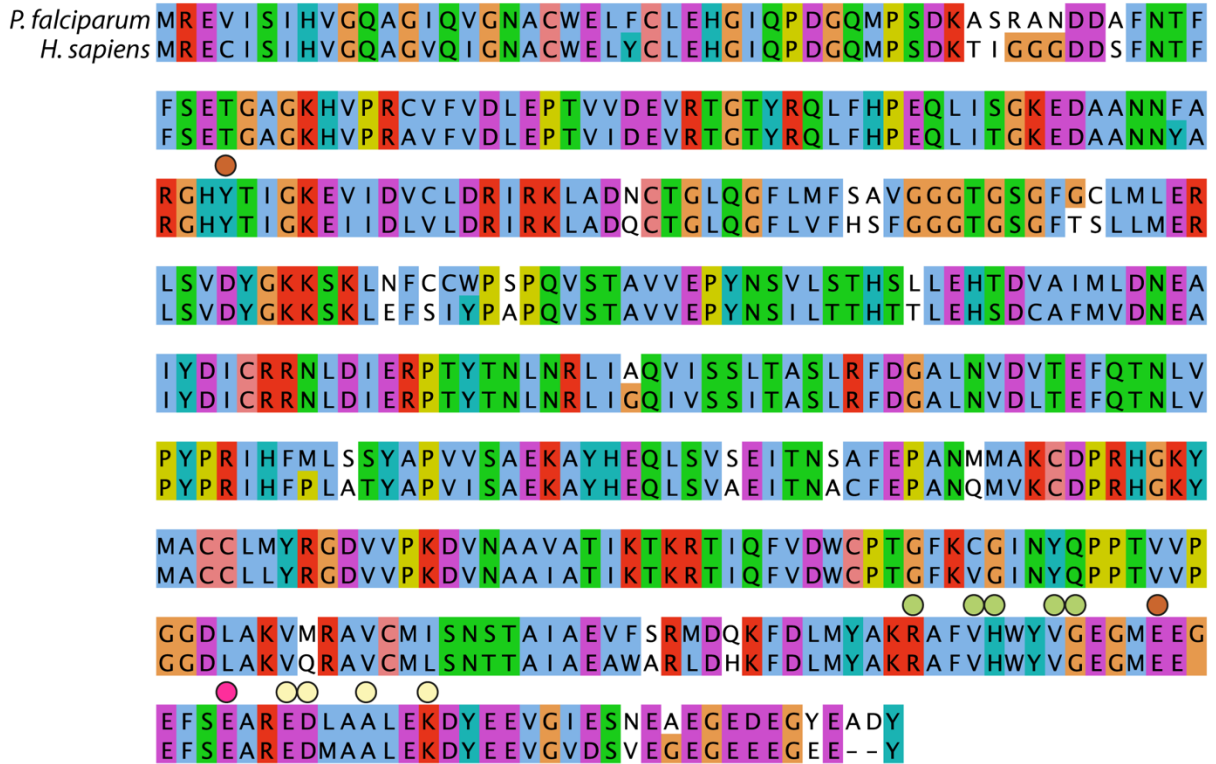

**β-tubulin**

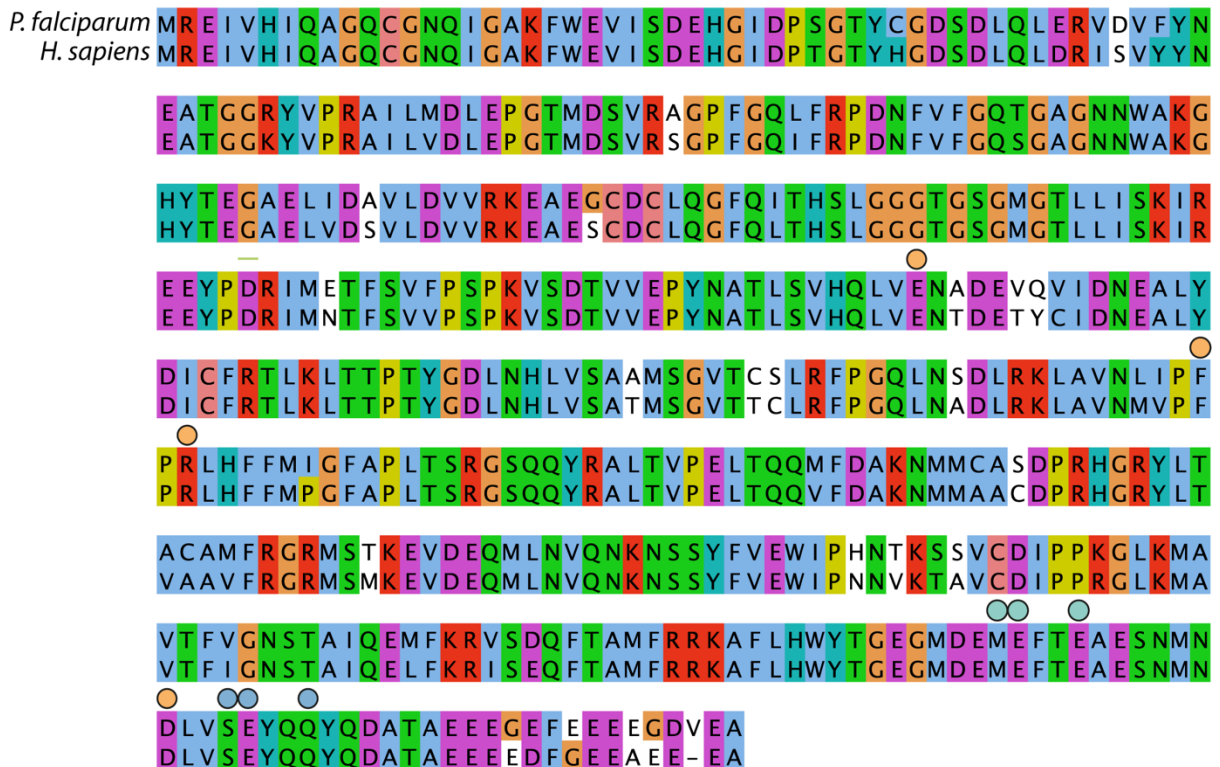

β-lobe-2 Helixa5 Loop12 Helixa4 Loop11 Helixa6 β-lobe-1/loop2

**Figure S7. Sequence conservation between *P. falciparum* and *H. sapiens*  $\alpha\beta$ -tubulin.** *P. falciparum*  $\alpha$ 1-tubulin (Uniprot ID: P14642) and  $\beta$ -tubulin (P14643), and *H. sapiens*  $\alpha$ -tubulin (Uniprot ID: Q71U36) and  $\beta$ -tubulin (P07437), were aligned in with MAFFT<sup>66</sup> using the L-INS-I method, and visualised in Jalview<sup>88</sup>. Black lines indicate the sections of tubulin that contribute to the kinesin binding site.

| Kinesin motor domain secondary structure elements | Subdomain   | Change In angle between no nucleotide and ATP-like states (°) |
|---------------------------------------------------|-------------|---------------------------------------------------------------|
| $\alpha 0$                                        | P-loop      | 9                                                             |
| $\alpha 1$                                        | P-loop      | 9                                                             |
| $\alpha 2$                                        | switch-I/II | 13                                                            |
| $\alpha 3$                                        | switch-I/II | 15                                                            |
| $\alpha 4$                                        | MT binding  | 1                                                             |
| $\alpha 5$                                        | MT binding  | 0                                                             |
| $\alpha 6$                                        | P-loop      | 13                                                            |

**Table S1. Comparative rotation of *PfK5ΔL6*-MD helices between the no nucleotide and AMPPNP states.**

| $\alpha$ -tubulin residue | $\beta$ -tubulin residue | <i>PfK5ΔL6</i> -MD (no nucleotide) | <i>PfK5ΔL6</i> -MD (AMPPNP) | <i>PfK5ΔL6</i> -MD secondary structure element |
|---------------------------|--------------------------|------------------------------------|-----------------------------|------------------------------------------------|
| Glu423                    |                          | Arg52                              | Arg52                       | $\beta$ lobe-1/loop2                           |
| Asp424                    |                          |                                    | Asn53                       |                                                |
| Lys430                    |                          |                                    | Glu55                       |                                                |
| Glu423                    |                          | Lys59                              | Lys59                       |                                                |
|                           | Met406                   |                                    | Arg303                      | $\beta$ Lobe-2                                 |
|                           | Glu407                   |                                    | Arg303                      |                                                |
|                           | Glu410                   |                                    | Arg303                      |                                                |
|                           | Met406                   |                                    | Tyr305                      |                                                |
|                           | Glu410                   | Tyr305                             | Tyr305                      |                                                |
|                           | Met406                   | Glu306                             |                             |                                                |
|                           | Glu410                   | Glu306                             |                             |                                                |
| Glu414                    |                          |                                    | Ser390                      | Loop11                                         |
| Glu414                    |                          | Asn392                             |                             |                                                |
| Tyr108                    |                          |                                    | Leu394                      |                                                |
|                           | Asp161                   | Lys402                             | Lys402                      | Helix $\alpha$ 4/loop12                        |
| Gly410                    |                          | Gln405                             |                             |                                                |
| Gly410                    |                          |                                    | Cys409                      |                                                |
| Val409                    |                          | Asn412                             | Asn412                      |                                                |
| Gly410                    |                          | Gln413                             | Gln413                      |                                                |
| Val405                    |                          | Leu416                             |                             |                                                |
| Val409                    |                          | Leu416                             |                             |                                                |
| His406                    |                          | Leu416                             | Leu416                      |                                                |
| Glu415                    |                          |                                    | Leu416                      |                                                |
| Lys401                    |                          | Glu427                             |                             |                                                |
|                           | Gln424                   |                                    | Ser430                      |                                                |
|                           | Asp417                   | Tyr431                             | Tyr431                      |                                                |
|                           | Ser420                   |                                    | Tyr431                      |                                                |
|                           | Glu421                   |                                    | Tyr431                      |                                                |
|                           | Gln424                   |                                    | Tyr431                      |                                                |
|                           | Glu421                   | Ile432                             |                             | Helix $\alpha$ 5                               |

|        |        |        |        |                  |
|--------|--------|--------|--------|------------------|
|        | Asp417 | Arg435 | Arg435 |                  |
|        | Arg262 | Arg435 |        |                  |
|        | Phe260 |        | Asp436 |                  |
|        | Arg262 | Asp436 | Asp436 |                  |
|        | Glu194 |        | Lys438 |                  |
|        | Glu410 | Arg441 |        |                  |
|        | Asp417 |        | Arg441 |                  |
| Glu420 |        |        | Asp467 | Helix $\alpha$ 5 |
| Glu414 |        | Ser471 |        |                  |
| Ser419 |        | Asp474 |        |                  |
| Tyr399 |        | Arg478 |        |                  |
| Arg402 |        | Arg478 |        |                  |
| Ser419 |        | Arg478 |        |                  |

**Table S2. Residue-residue contacts between the *Pfk5 $\Delta$ L6*-MD no nucleotide and AMPPNP states, and  $\alpha\beta$ -tubulin. Residues within contact distance were detected in Chimera.**

| Parameter        | PF Sorting        | Initial Seam Alignment |              |                    |            | Seam Check            |
|------------------|-------------------|------------------------|--------------|--------------------|------------|-----------------------|
|                  |                   | Global Search          | Local Search | Rot Refine         | X/Y Refine |                       |
| Offset range     | 15                | 15                     | 15           | 15                 | 4          | -                     |
| Offset step      | 1                 | 1                      | 1            | 1                  | 0.5        |                       |
| Angular sampling | 1.8               | 0.9                    | 0.9          | 0.9                | 0.9        |                       |
| Sigma Rot        | 0                 | 0                      | 18           | 3                  | 3          |                       |
| Iterations       | 1                 | 1                      | 1            | 10                 | 10         | 1                     |
| MiRP pre-run     | -                 | Reset R, X, Y*         | Reset X, Y   | Reset X, Y         | -          | -                     |
| MiRP post-run    | Vote on PF Number | Vote on Rot            | Vote on Rot  | Vote on X/Y shifts | -          | Vote on seam position |

**Table S3. MiRP Alignment parameters.** \* R.= Rot angle, X = X-shift, Y = Y-shift.

| Start        | End        | Restraint        |
|--------------|------------|------------------|
| 151          | 172        | $\alpha$ -helix  |
| O1B (AMPPNP) | NZ Lys106  | distance (2.7 Å) |
| O1G (AMPPNP) | NZ Lys106  | distance (2.4 Å) |
| CA           | NZ Lys106  | distance (5.8 Å) |
| OE1 Glu391   | NH2 Arg355 | distance (2.5 Å) |
| OE2 Glu391   | NH1 Arg355 | distance (4 Å)   |
| OD1 Asn412   | N Glu391   | distance (2.9 Å) |
| ND2 Asn412   | O Glu391   | distance (2.8 Å) |

**Table S4. Restraints used in *Pfk5 $\Delta$ L6*-MD homology model generation**
